# Supplementary material
Source: Springer Nature journal article supplement (https://www.springermedizin.de/resource/supplementary/13075_2009_2717_MOESM4_ESM.pdf/9692732)

**A**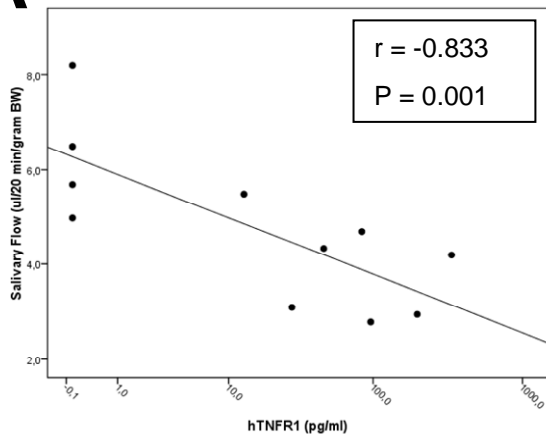**B**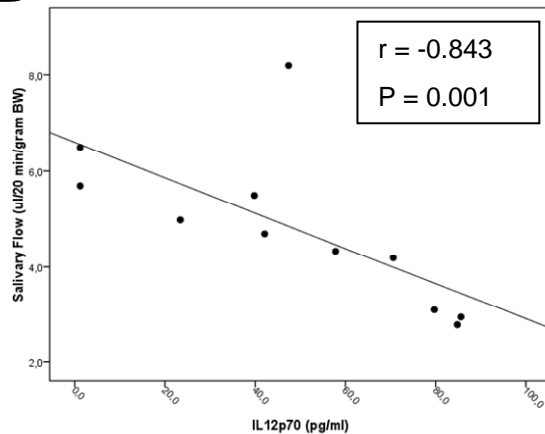**C**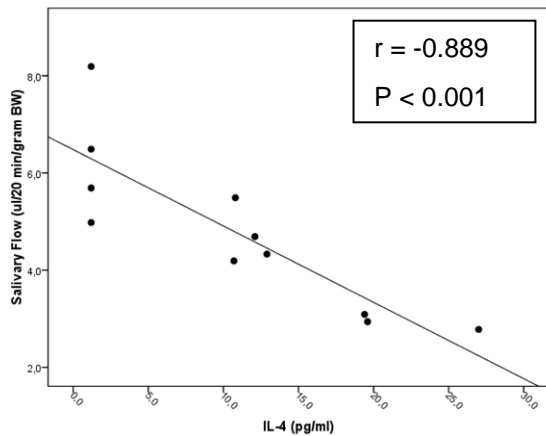**D**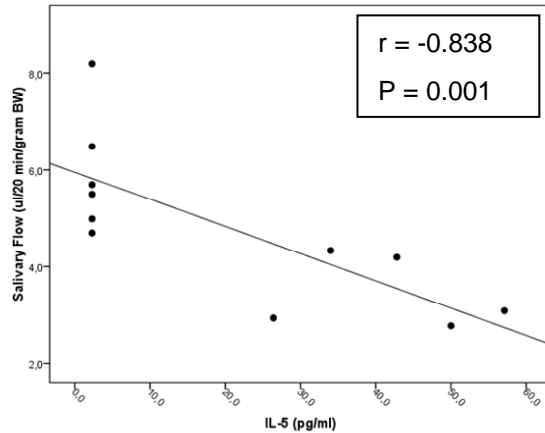

Supplement: MOESM4 [file 9692732]
